# Supplementary figures and images for: Marketing trials, marketing tricks — how to spot them and how to stop them
Source: Springer Nature journal article supplement (doi:10.1186/s13063-017-1827-5), 2017-03-06

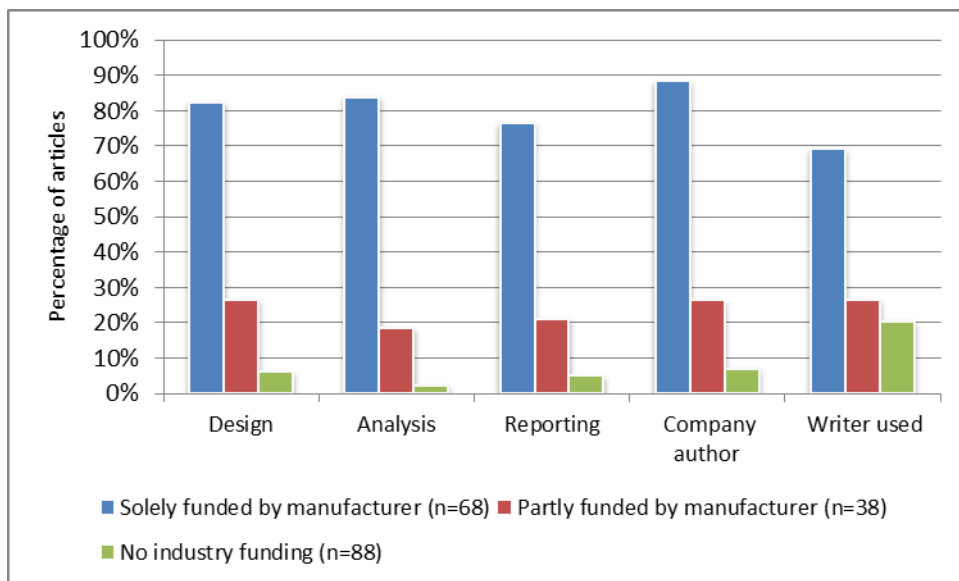

Supplement: MOESM1 [file 12127060]

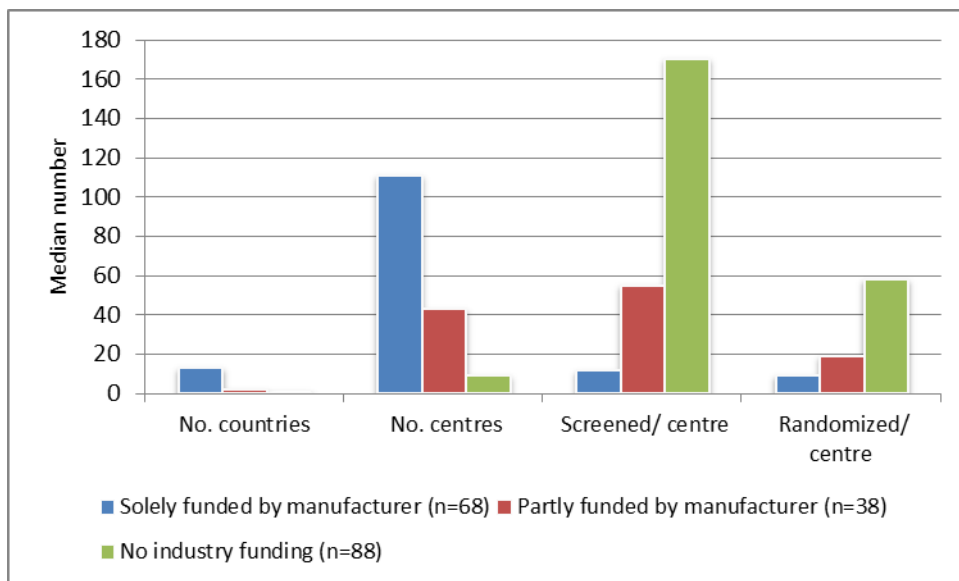

Supplement: MOESM1 [file 12127060]
